# Supplementary material
Source: HighWire-hosted journal article supplement (https://qualitysafety.bmj.com/highwire/filestream/161422/field_highwire_adjunct_files/0/bmjqs-2021-014372supp001_data_supplement.pdf)
Supplement: bmjqs-2021-014372supp001_data_supplement.pdf [file bmjqs-2021-014372supp001_data_supplement.pdf]

## SUPPLEMENT S1 – PARTICIPANT SELECTION: PURPOSIVE SAMPLE

For patients meeting the inclusion criteria, we aimed to ensure diversity in patient characteristics that may influence patient experience in order to enhance transferability of our findings. A purposive sample was selected by screening patients' medical records to ensure heterogeneity in terms of country, study arm, gender, age, hospital ward, education and living situation (at home/nursing home).

We estimated *a priori* that we would need to include 10-15 patients in each study site based on the following reasons: (a) we wanted to have a similar number of patients recruited from each site, as the research team considered that country and site (and implementation of intervention at each site) could influence patient's experience and (b) At each study site, we aimed to ensure diversity in the following patients characteristics in order to enhance the transferability of our findings:

- Study arm: e.g. 7-8 patients from the intervention arm and 7-8 patients from the control arm
- Gender: e.g.  $\geq 3$  men and  $\geq 3$  women per study arm
- Age: e.g.  $\geq 2$  patients  $>70$  &  $\leq 80$  years,  $\geq 2$  patients  $>80$  &  $\leq 90$  years and  $\geq 2$  patients  $\geq 90$  years per study arm
- Hospital ward : e.g.  $\geq 3$  patients from a surgical ward and  $\geq 3$  from a medical ward per study arm
- Education : e.g.  $\geq 2$  patients with less than high school education,  $\geq 2$  patients with a high school degree and  $\geq 2$  patients with a post-secondary degree (diploma from a university or equivalent institution) per study arm
- Living situation: e.g.  $\geq 3$  patients living in a nursing home and  $\geq 3$  patients living at home per study arm

The final purposive sample of 48 patients is shown in Table 1.

Table 1: Purposive sample (n=48)

| <b>Study arm</b>        | <b>Intervention arm</b>                |                               |                              |                        | <b>Control arm</b>                     |                               |                              |                        |
|-------------------------|----------------------------------------|-------------------------------|------------------------------|------------------------|----------------------------------------|-------------------------------|------------------------------|------------------------|
| <i>n of patients</i>    | 27                                     |                               |                              |                        | 21                                     |                               |                              |                        |
| <b>Gender</b>           | <b>Female</b>                          |                               | <b>Male</b>                  |                        | <b>Female</b>                          |                               | <b>Male</b>                  |                        |
| <i>n of patients</i>    | 15                                     |                               | 12                           |                        | 8                                      |                               | 13                           |                        |
| <b>Age</b>              | <b>&gt;70 &amp; ≤80 years</b>          | <b>&gt;80 &amp; ≤90 years</b> | <b>≥90 years</b>             |                        | <b>&gt;70 &amp; ≤80 years</b>          | <b>&gt;80 &amp; ≤90 years</b> | <b>≥90 years</b>             |                        |
| <i>n of patients</i>    | 21                                     | 6                             | 0                            |                        | 13                                     | 7                             | 1                            |                        |
| <b>Hospital ward</b>    | <b>Medical ward</b>                    |                               | <b>Surgical ward</b>         |                        | <b>Medical ward</b>                    |                               | <b>Surgical ward</b>         |                        |
| <i>n of patients</i>    | 18                                     |                               | 9                            |                        | 18                                     |                               | 3                            |                        |
| <b>Education</b>        | <b>Less than high school education</b> | <b>High school degree</b>     | <b>Post-secondary degree</b> |                        | <b>Less than high school education</b> | <b>High school degree</b>     | <b>Post-secondary degree</b> |                        |
| <i>n of patients</i>    | 3                                      | 16                            | 8                            |                        | 4                                      | 7                             | 10                           |                        |
| <b>Living situation</b> | <b>Nursing home</b>                    |                               | <b>At home</b>               |                        | <b>Nursing home</b>                    |                               | <b>At home</b>               |                        |
| <i>n of patients</i>    | 2                                      |                               | 25                           |                        | 1                                      |                               | 20                           |                        |
| <b>Country</b>          | <b>Belgium</b>                         | <b>Ireland</b>                | <b>Switzerland</b>           | <b>The Netherlands</b> | <b>Belgium</b>                         | <b>Ireland</b>                | <b>Switzerland</b>           | <b>The Netherlands</b> |
| <i>n of patients</i>    | 8                                      | 3                             | 8                            | 8                      | 7                                      | 4                             | 3                            | 7                      |
